# Supplementary material for: Bioinspired nanocatalytic tumor therapy by simultaneous reactive oxygen species generation enhancement and glutamine pathway-mediated glutathione depletion
Source: Royal Society of Chemistry journal article supplement (doi:10.1039/d2tb02194c), 2022-11-21
Supplement: d2tb02194c1.pdf [file d2tb02194c1.pdf]

1

## Supporting Information

2

3 **Bioinspired nanocatalytic tumor therapy by simultaneous reactive**  
4 **oxygen species generation enhancement and glutamine pathway-**  
5 **mediated glutathione depletion**

6 Huijia Mao<sup>1</sup>, Yangyang Wen<sup>2</sup>, Yonghui Yu<sup>1</sup>, Hongyan Li<sup>1,\*</sup>, Jing Wang<sup>1,\*</sup>, Baoguo  
7 Sun<sup>1</sup>

8

9 <sup>1</sup> *China-Canada Joint Lab of Food Nutrition and Health (Beijing), School of Food and*  
10 *Health, Beijing Technology and Business University (BTBU), 11 Fucheng Road,*  
11 *Beijing 100048, China*

12 <sup>2</sup> *College of Chemistry and Materials Engineering, Beijing Technology and Business*  
13 *University (BTBU), 11 Fucheng Road, Beijing 100048, China*

14 \* *Corresponding author e-mail:*

15 *Hongyan Li: [hongyan.li@btbu.edu.cn](mailto:hongyan.li@btbu.edu.cn)*

16 *Jing Wang: [wangjing@th.btbu.edu.cn](mailto:wangjing@th.btbu.edu.cn)*

17

18

19

## Supplementary Methods

### 20 **Materials**

21 Sodium salicylate (NaSal), triethanolamine (TEA), tetraethyl orthosilicate (TEOS),  
22 cetyltrimethylammonium bromide (CTAB), (3-Aminopropyl) triethoxysilane, iron  
23 chloride ( $\text{FeCl}_3 \cdot 6\text{H}_2\text{O}$ ), oleyl alcohol, sodium oleate,  $\text{HAuCl}_4 \cdot 4\text{H}_2\text{O}$ , diphenyl ether,  
24 sodium phosphate dibasic ( $\text{Na}_2\text{HPO}_4$ ), and acetic acid were purchased from Macklin  
25 Biochemical Co., Ltd (Shanghai, China). Acetone, n-hexane and ethanol were  
26 purchased from Fuchen Chemical Reagent Co., Ltd (Tianjin, China). 3,3',5,5'-  
27 tetramethylbenzidine (TMB) was obtained from Aladdin Co., Ltd (Shanghai, China).  
28 Hydrochloric acid (HCl), glucose, and hydrogen peroxide ( $\text{H}_2\text{O}_2$ ) were ordered from  
29 Sinopharm Chemical Reagent Co., Ltd (Shanghai, China). Fluorescein isothiocyanate  
30 (FITC) and Methoxy PEG-thiol (mPEG-SH, Mw = 5000) were received from Xi'an  
31 Ruixi Biological Technology Co., Ltd (Xi'an, China). Dimethyl sulfoxide (DMSO) was  
32 from Merck Co., Inc. (Germany). All chemicals were used as received without further  
33 purification.

### 34 **Cell Culture**

35 Murine breast cancer cells 4T1, human pulmonary carcinoma cells A549, human  
36 umbilical vein endothelial (HUVEC) cells and rat myoblast L6 cells were obtained from  
37 Cell Resource Center, Shanghai Institutes for Biological Sciences, Chinese Academy  
38 of Sciences (Shanghai, China) and 4T1 cells were used as the model cells in this work.  
39 All cells were maintained in high glucose DMEM medium with FBS (10%, v/v),  
40 penicillin/streptomycin (1%, v/v) and incubated under 37 °C with 5%  $\text{CO}_2$  in a  
41 humidified incubator.

42

## Supplementary Figures

43

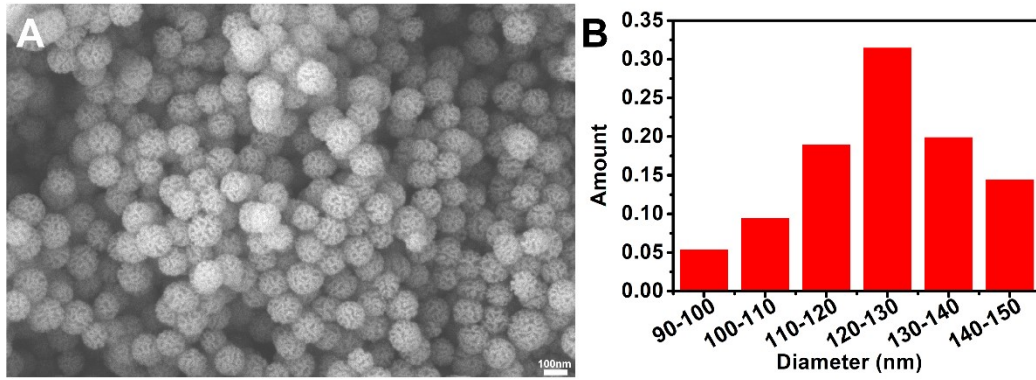

44

45

Fig. S1. (A) SEM image and (B) size distribution histogram of DMSN.

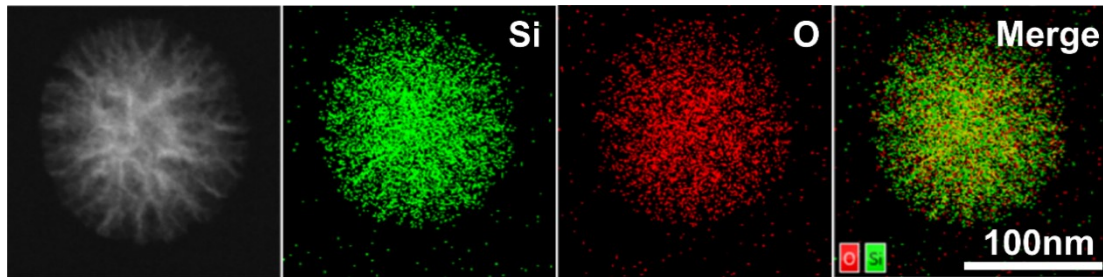

46

47 Fig. S2. Dark-field STEM image of DMSN NPs and corresponding element mappings

48 for elements of O, Si and merge, respectively.

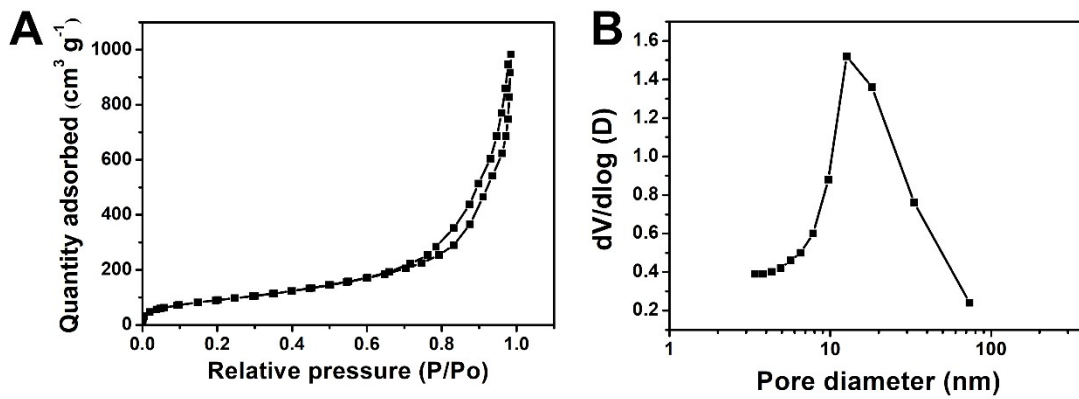

49

50

Fig. S3. (A) N<sub>2</sub> sorption isotherms and (B) pore size distributions of DMSN.

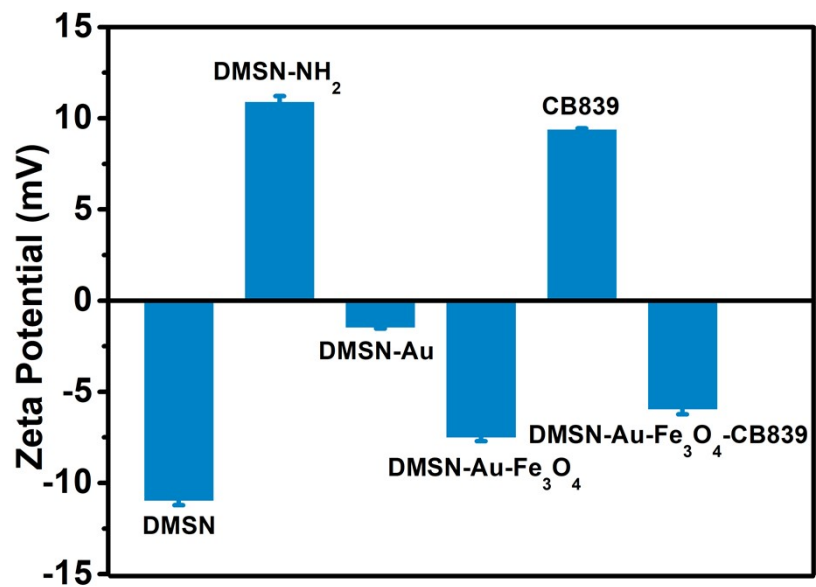

51

52

Fig. S4. Zeta potentials of samples.

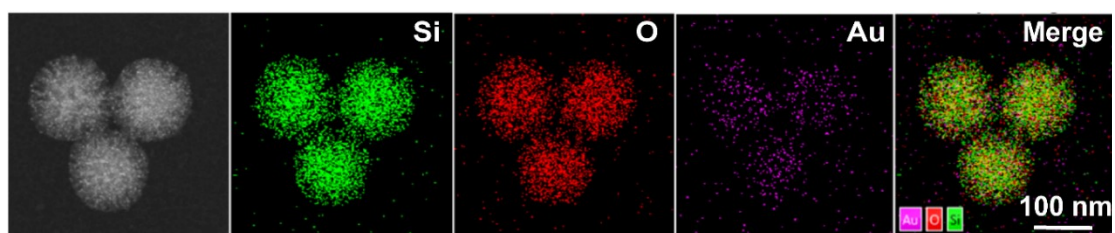

53

54 Fig. S5. Dark-field STEM image of DMSN-Au NPs and corresponding element

55 mappings for elements of O, Si, Au and merge, respectively.

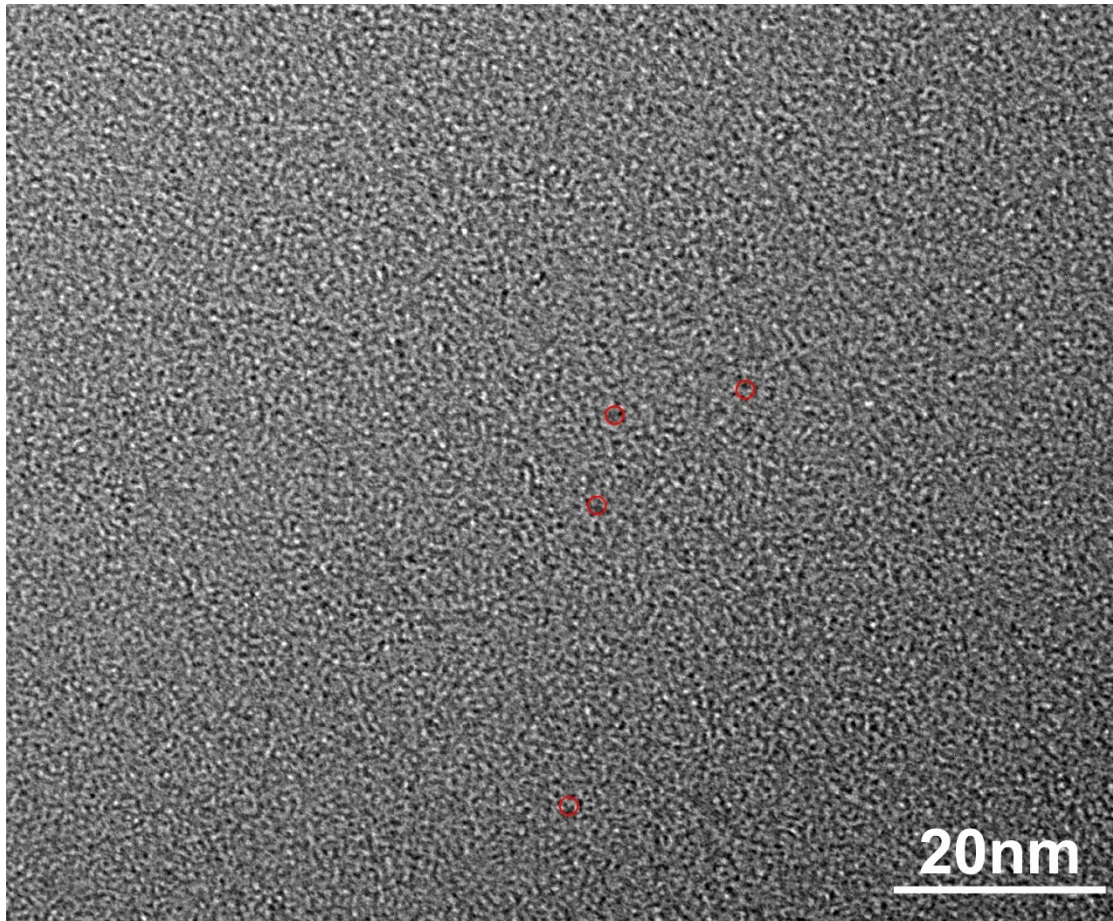

56

57

Fig. S6. TEM image of monodispersed ultrasmall Fe<sub>3</sub>O<sub>4</sub> NPs.

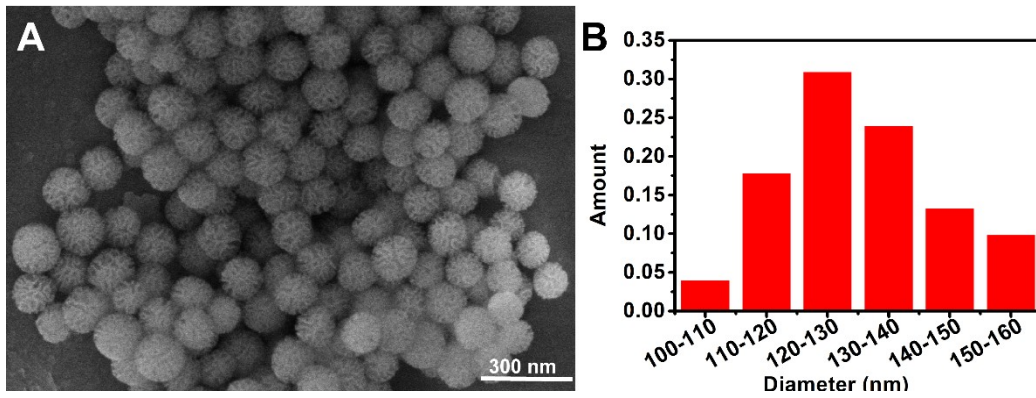

58

Fig. S7. (A) SEM image and (B) size distribution histogram of DMSN-Au-Fe<sub>3</sub>O<sub>4</sub>.

59



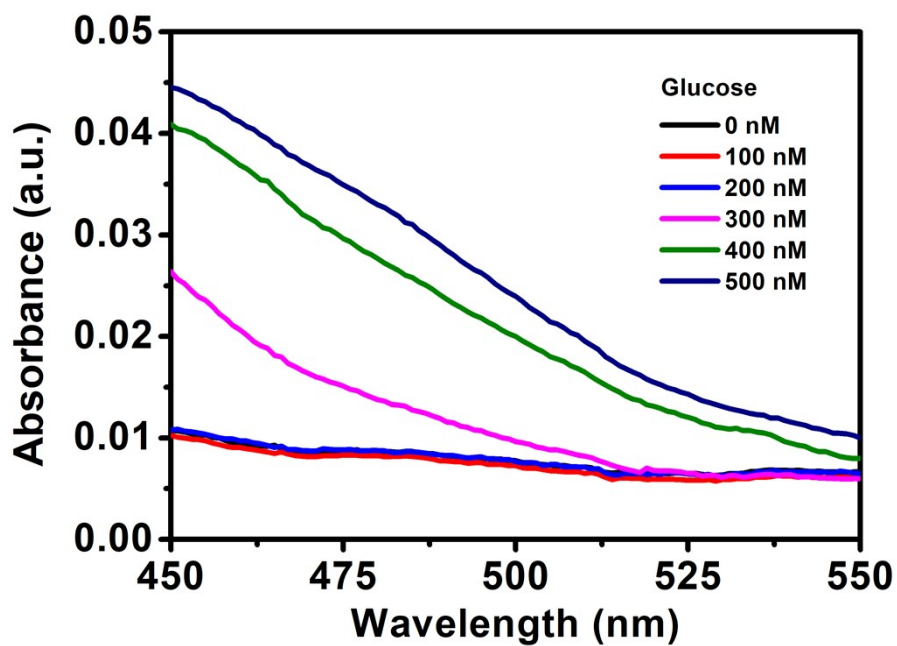

60

61 Fig. S8. UV-vis absorption spectra of DMSN-Au-Fe<sub>3</sub>O<sub>4</sub> after incubation with glucose  
 62 at varied concentrations (0, 100, 200, 300, 400, 500 × 10<sup>-3</sup> M) for 1 h.

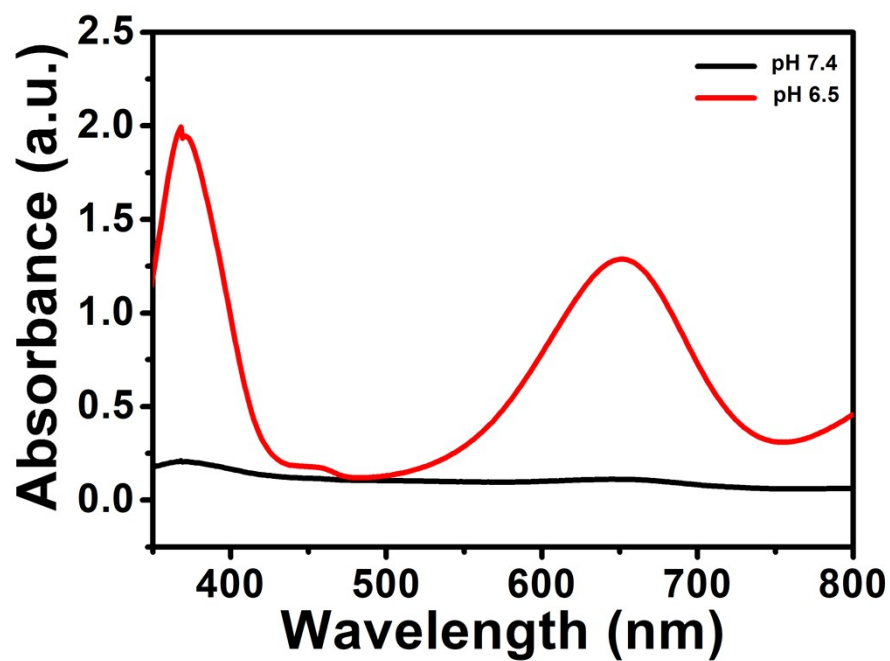

63

64 Fig. S9. UV-vis absorption spectra of the catalyzed oxidation of TMB (oxTMB) as  
 65 catalyzed by DMSN-Au-Fe<sub>3</sub>O<sub>4</sub> in different reaction buffers (pH 6.5, pH 7.4).

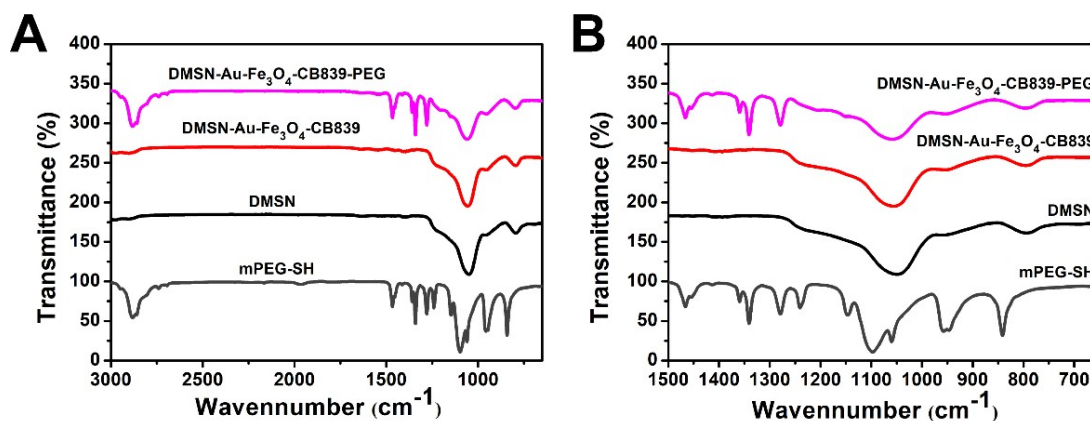

66

67 Fig. S10. (A) FTIR spectra of mPEG-SH, DMSN, DMSN-Au-Fe<sub>3</sub>O<sub>4</sub>-CB839 and  
 68 DMSN-Au-Fe<sub>3</sub>O<sub>4</sub>-CB839-PEG samples. (B) Enlarged region of the framed zone in  
 69 panel A.

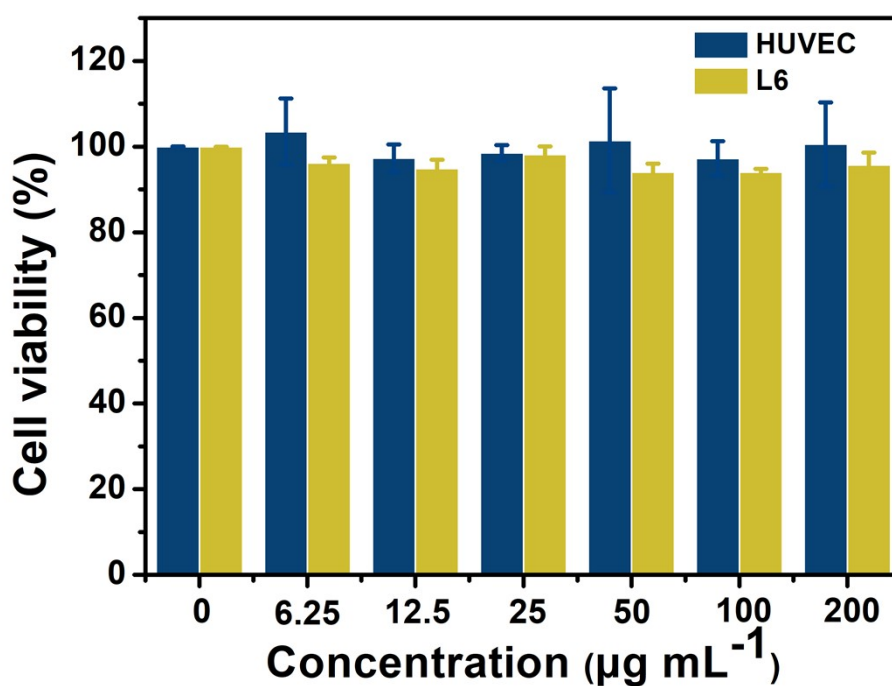

70

71 Fig. S11. HUVEC cells and L6 cells treated with various concentrations of DMSN-Au-  
 72 Fe<sub>3</sub>O<sub>4</sub>-CB839 for 24 h.

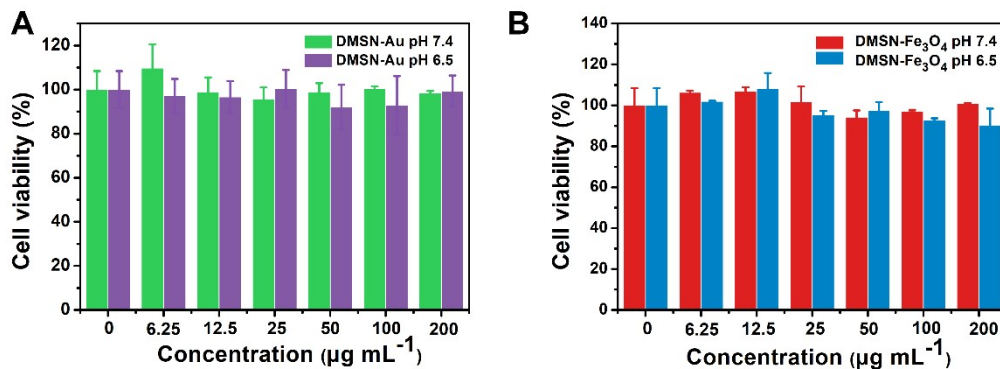

73

74 Fig. S12. Relative viabilities of 4T1 cells after being incubated with (A) DMSN-Au  
 75 NPs and (B) DMSN-Fe<sub>3</sub>O<sub>4</sub> NPs at varied concentrations (0, 6.25, 12.5, 25, 50, 100, and  
 76 200  $\mu\text{g}\cdot\text{mL}^{-1}$ ) for 24 h at pH 7.4 and 6.5.

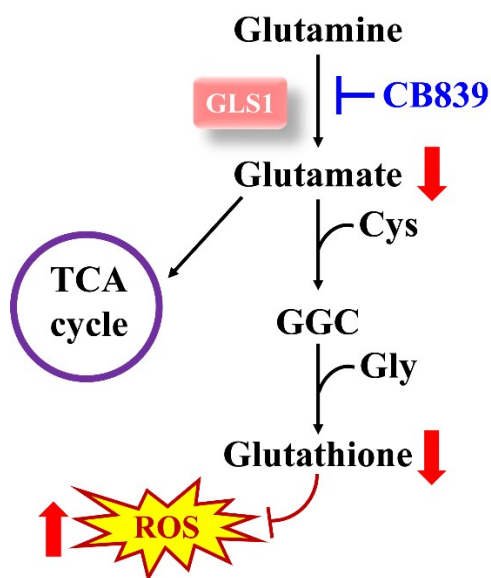

77

78

Fig. S13. The synthesis pathway of glutathione.

79



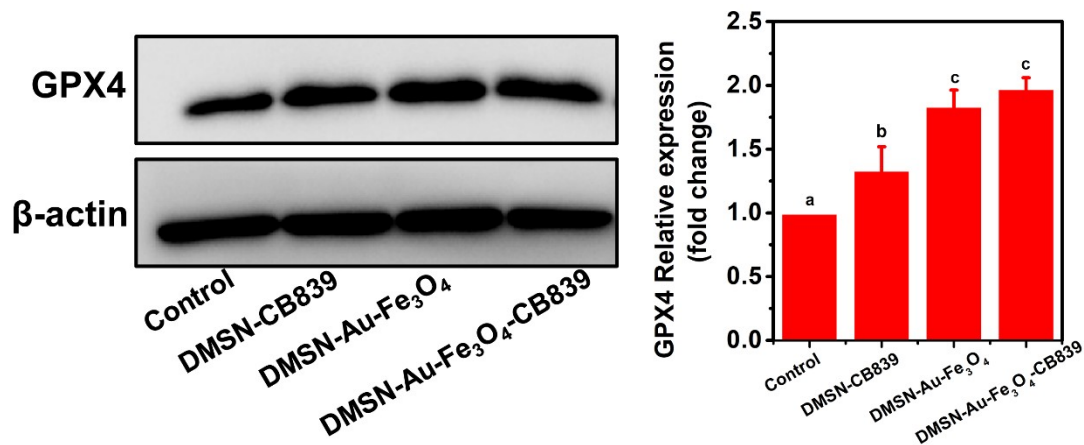

80

81 Fig. S14. Immunoblot analysis for the expressions of redox indicator proteins GPX4 in

82 4T1 cells. β-actin was used as a loading control.

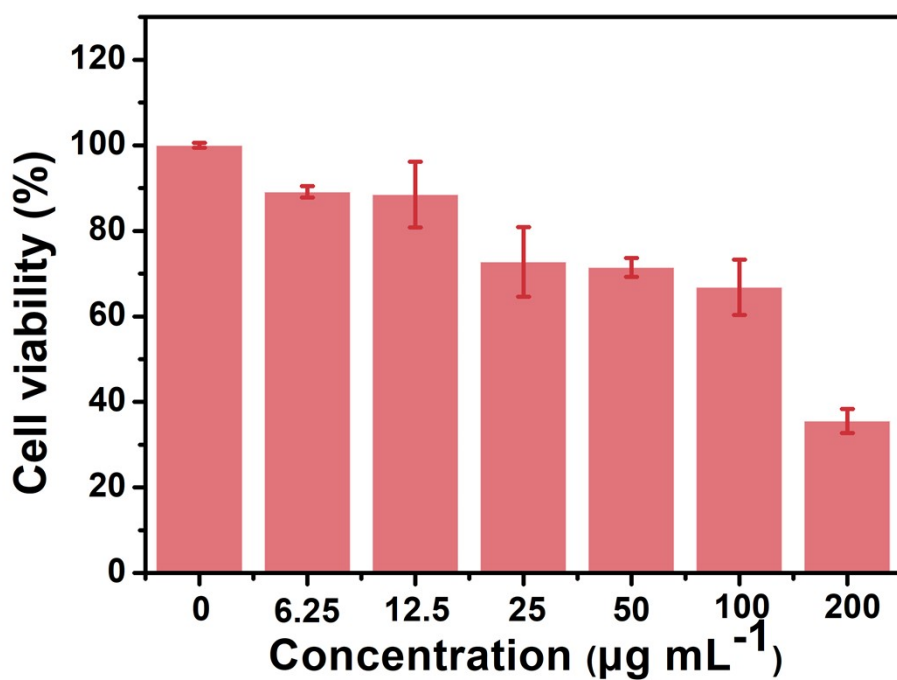

83

84 Fig. S15. A549 cells treated with different concentrations of DMSN-Au-Fe<sub>3</sub>O<sub>4</sub>-CB839

85 for 24 h.

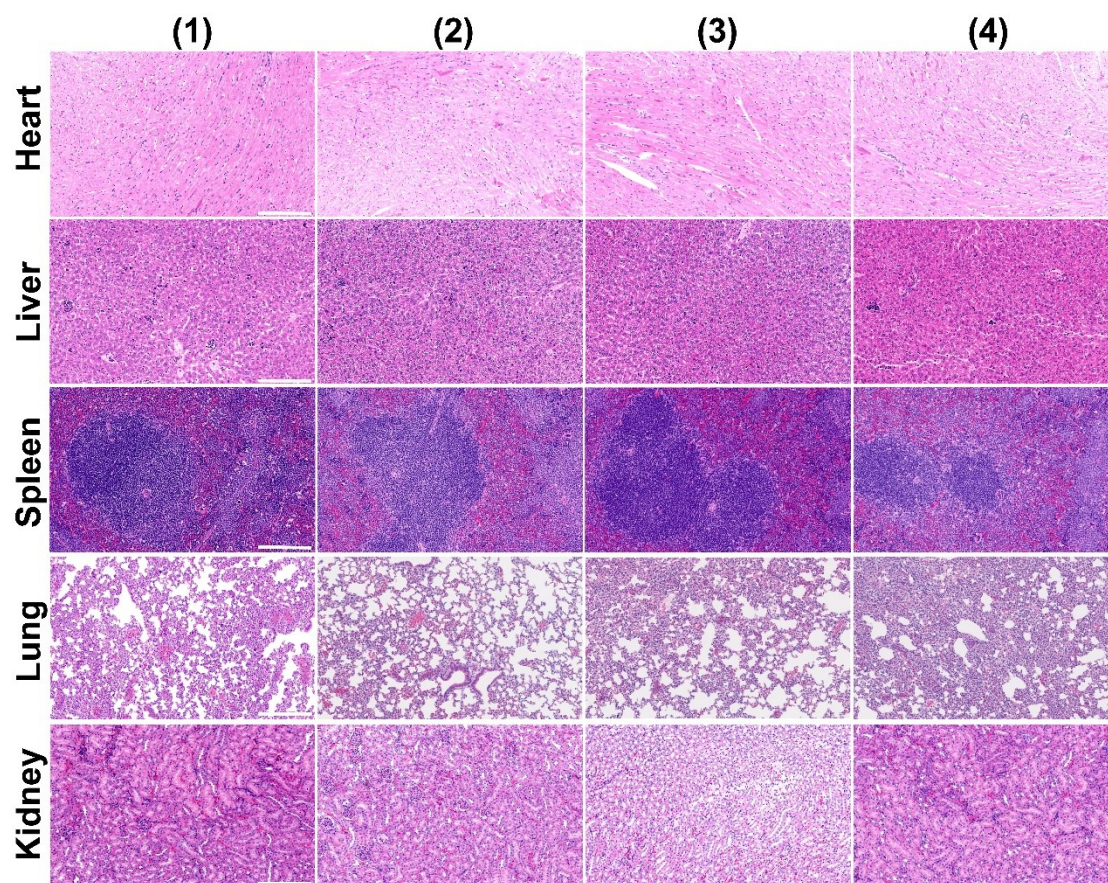

86

87 Fig. S16. H&E-stained images of normal tissue (heart, liver, spleen, lung and kidney)  
 88 of 4T1 tumor-bearing mice treated with different formulations. Scale bars are 200  $\mu\text{m}$ .  
 89 Groups (1), (2), (3), and (4) represent PBS, DMSN-CB839 ( $20 \text{ mg}\cdot\text{kg}^{-1}$ ), DMSN-Au-  
 90  $\text{Fe}_3\text{O}_4$  ( $20 \text{ mg}\cdot\text{kg}^{-1}$ ), and DMSN-Au- $\text{Fe}_3\text{O}_4$ -CB839 ( $20 \text{ mg}\cdot\text{kg}^{-1}$ ), respectively.
